# Supplementary material for: Electronic and photophysical properties of an atomically thin bowl-shaped beryllene encapsulated inside the cavity of [6]cycloparaphenylene (Ben@[6]CPP)
Source: Royal Society of Chemistry journal article supplement (doi:10.1039/d3cp01952g), 2023-01-01
Supplement: d3cp01952g1.pdf [file d3cp01952g1.pdf]

## Electronic Supporting Information

### Electronic and photophysical properties of an atomically thin bowl-shaped beryllene encapsulated inside the cavity of [6]Cycloparaphenylene ( $\text{Be}_n@[\text{6}]\text{CPP}$ )

Akanksha Ashok Sangolkar, Rama Krishna Kadiyam, Mohmmad Faizan, Omshireesh Chedupaka, Raghasudha Mucherla, and Ravinder Pawar\*

Laboratory of Advanced Computation and Theory for Materials and Chemistry, Department of Chemistry, National Institute of Technology Warangal (NITW), Warangal, Telangana-506004, India.

[ravinder\\_pawar@nitw.ac.in](mailto:ravinder_pawar@nitw.ac.in)

#### S1: Interaction energy ( $IE$ ) calculated with EDA-ADF and BSSE corrected counterpoise calculation using Gaussian16.

**Table S1:** Interaction energy ( $IE_a$ ) between single Be atom and the preceding  $\text{Be}_{n-1}@[\text{6}]\text{CPP}$  system.

| System                                | Pauli | Electrostatic | Orbital | $IE_a$ | % Contribution to stabilize the complex |          | BSSE corrected $IE_a$ |
|---------------------------------------|-------|---------------|---------|--------|-----------------------------------------|----------|-----------------------|
|                                       |       |               |         |        | %Electrostatic                          | %Orbital |                       |
| $\text{Be}_1@[\text{6}]\text{CPP}$    | 21.86 | -11.41        | -13.28  | -2.83  | 46.21                                   | 53.79    | -2.81                 |
| $\text{Be}_2@[\text{6}]\text{CPP}$    | 18.10 | -9.75         | -12.68  | -4.33  | 43.46                                   | 56.54    | -4.31                 |
| $\text{Be}_3@[\text{6}]\text{CPP}$    | 28.89 | -13.91        | -19.28  | -4.30  | 41.90                                   | 58.10    | -4.28                 |
| $\text{Be}_4@[\text{6}]\text{CPP}$    | 13.33 | -7.80         | -8.99   | -3.46  | 46.44                                   | 53.56    | -3.43                 |
| $\text{Be}_5@[\text{6}]\text{CPP}$    | 13.63 | -7.78         | -11.09  | -5.24  | 41.21                                   | 58.79    | -5.41                 |
| $\text{Be}_6@[\text{6}]\text{CPP}$    | 25.22 | -12.10        | -16.91  | -3.80  | 41.70                                   | 58.30    | -4.02                 |
| $\text{Be}_7@[\text{6}]\text{CPP}$    | 21.42 | -9.55         | -16.23  | -4.35  | 37.06                                   | 62.94    | -4.36                 |
| $\text{Be}_8@[\text{6}]\text{CPP}$    | 24.10 | -9.07         | -19.59  | -4.56  | 31.65                                   | 68.35    | -4.57                 |
| $\text{Be}_9@[\text{6}]\text{CPP}$    | 24.66 | -9.19         | -20.88  | -5.41  | 30.57                                   | 69.43    | -5.39                 |
| $\text{Be}_{10}@[\text{6}]\text{CPP}$ | 21.48 | -10.71        | -15.02  | -4.25  | 41.61                                   | 58.39    | -4.25                 |

\* All the energy values are given in eV.

**Table S2:** Interaction energy ( $IE_c$ ) to determine the total interaction between  $Be_n$  cluster and the distorted [6]CPP in the complex.

| System                   | Pauli  | Electrostatic | Orbital | $IE_c$ | % Contribution to stabilize the complex |          | BSSE corrected $IE_c$ |
|--------------------------|--------|---------------|---------|--------|-----------------------------------------|----------|-----------------------|
|                          |        |               |         |        | %Electrostatic                          | %Orbital |                       |
| Be <sub>1</sub> @[6]CPP  | 21.86  | -11.41        | -13.28  | -2.83  | 46.21                                   | 53.79    | -2.81                 |
| Be <sub>2</sub> @[6]CPP  | 29.55  | -16.23        | -18.36  | -5.04  | 46.92                                   | 53.08    | -5.01                 |
| Be <sub>3</sub> @[6]CPP  | 59.97  | -30.62        | -39.29  | -9.94  | 43.80                                   | 56.20    | -9.89                 |
| Be <sub>4</sub> @[6]CPP  | 60.41  | -32.94        | -38.09  | -10.62 | 46.37                                   | 53.63    | -10.56                |
| Be <sub>5</sub> @[6]CPP  | 48.14  | -26.81        | -31.95  | -10.63 | 45.62                                   | 54.38    | -9.72                 |
| Be <sub>6</sub> @[6]CPP  | 54.95  | -28.94        | -38.03  | -12.02 | 43.21                                   | 56.79    | -11.91                |
| Be <sub>7</sub> @[6]CPP  | 43.23  | -24.65        | -28.35  | -9.78  | 46.51                                   | 53.49    | -9.70                 |
| Be <sub>8</sub> @[6]CPP  | 88.70  | -43.59        | -59.09  | -13.98 | 42.45                                   | 57.55    | -13.81                |
| Be <sub>9</sub> @[6]CPP  | 67.18  | -37.66        | -43.48  | -13.96 | 46.41                                   | 53.59    | -13.50                |
| Be <sub>10</sub> @[6]CPP | 103.94 | -51.51        | -71.11  | -18.67 | 42.01                                   | 57.99    | -18.45                |

\* All the energy values are given in eV.

**Table S3:** Interaction energy ( $IE_a$ ) between single Be atom and the preceding  $Be_{n-1}$ @[6]CPP system (including dispersion correction).

| System                   | Pauli  | Electrostatic | Dispersion | Orbital | $IE_a$ |
|--------------------------|--------|---------------|------------|---------|--------|
| Be <sub>1</sub> @[6]CPP  | 21.859 | -11.411       | -0.006     | -13.281 | -2.838 |
| Be <sub>2</sub> @[6]CPP  | 18.098 | -9.748        | -0.007     | -12.679 | -4.335 |
| Be <sub>3</sub> @[6]CPP  | 28.886 | -13.907       | -0.003     | -19.282 | -4.306 |
| Be <sub>4</sub> @[6]CPP  | 13.329 | -7.797        | -0.007     | -8.992  | -3.467 |
| Be <sub>5</sub> @[6]CPP  | 13.626 | -7.777        | -0.014     | -11.094 | -5.258 |
| Be <sub>6</sub> @[6]CPP  | 25.215 | -12.098       | -0.006     | -16.912 | -3.802 |
| Be <sub>7</sub> @[6]CPP  | 21.425 | -9.553        | -0.010     | -16.225 | -4.364 |
| Be <sub>8</sub> @[6]CPP  | 24.101 | -9.072        | -0.013     | -19.592 | -4.576 |
| Be <sub>9</sub> @[6]CPP  | 24.658 | -9.190        | -0.013     | -20.876 | -5.421 |
| Be <sub>10</sub> @[6]CPP | 21.478 | -10.706       | -0.007     | -15.020 | -4.256 |

\* All the energy values are given in eV.

**Table S4:** Interaction energy ( $IE_c$ ) between  $Be_n$  cluster and the distorted [6]CPP in the complex (including dispersion correction).

| System                   | Pauli   | Electrostatic | Dispersion | Orbital | $IE_c$  |
|--------------------------|---------|---------------|------------|---------|---------|
| Be <sub>1</sub> @[6]CPP  | 21.859  | -11.411       | -0.006     | -13.281 | -2.838  |
| Be <sub>2</sub> @[6]CPP  | 29.552  | -16.228       | -0.014     | -18.362 | -5.052  |
| Be <sub>3</sub> @[6]CPP  | 59.970  | -30.625       | -0.013     | -39.288 | -9.954  |
| Be <sub>4</sub> @[6]CPP  | 60.411  | -32.942       | -0.022     | -38.094 | -10.646 |
| Be <sub>5</sub> @[6]CPP  | 48.137  | -26.809       | -0.050     | -31.954 | -10.676 |
| Be <sub>6</sub> @[6]CPP  | 54.948  | -28.937       | -0.059     | -38.030 | -12.077 |
| Be <sub>7</sub> @[6]CPP  | 43.225  | -24.651       | -0.069     | -28.351 | -9.846  |
| Be <sub>8</sub> @[6]CPP  | 88.695  | -43.588       | -0.077     | -59.086 | -14.055 |
| Be <sub>9</sub> @[6]CPP  | 67.177  | -37.655       | -0.082     | -43.482 | -14.042 |
| Be <sub>10</sub> @[6]CPP | 103.940 | -51.506       | -0.090     | -71.108 | -18.764 |

\* All the energy values are given in eV.

**S2: Differential charge density (DCD) plots for  $\text{Be}_n@[\text{6}]$ CPP systems**

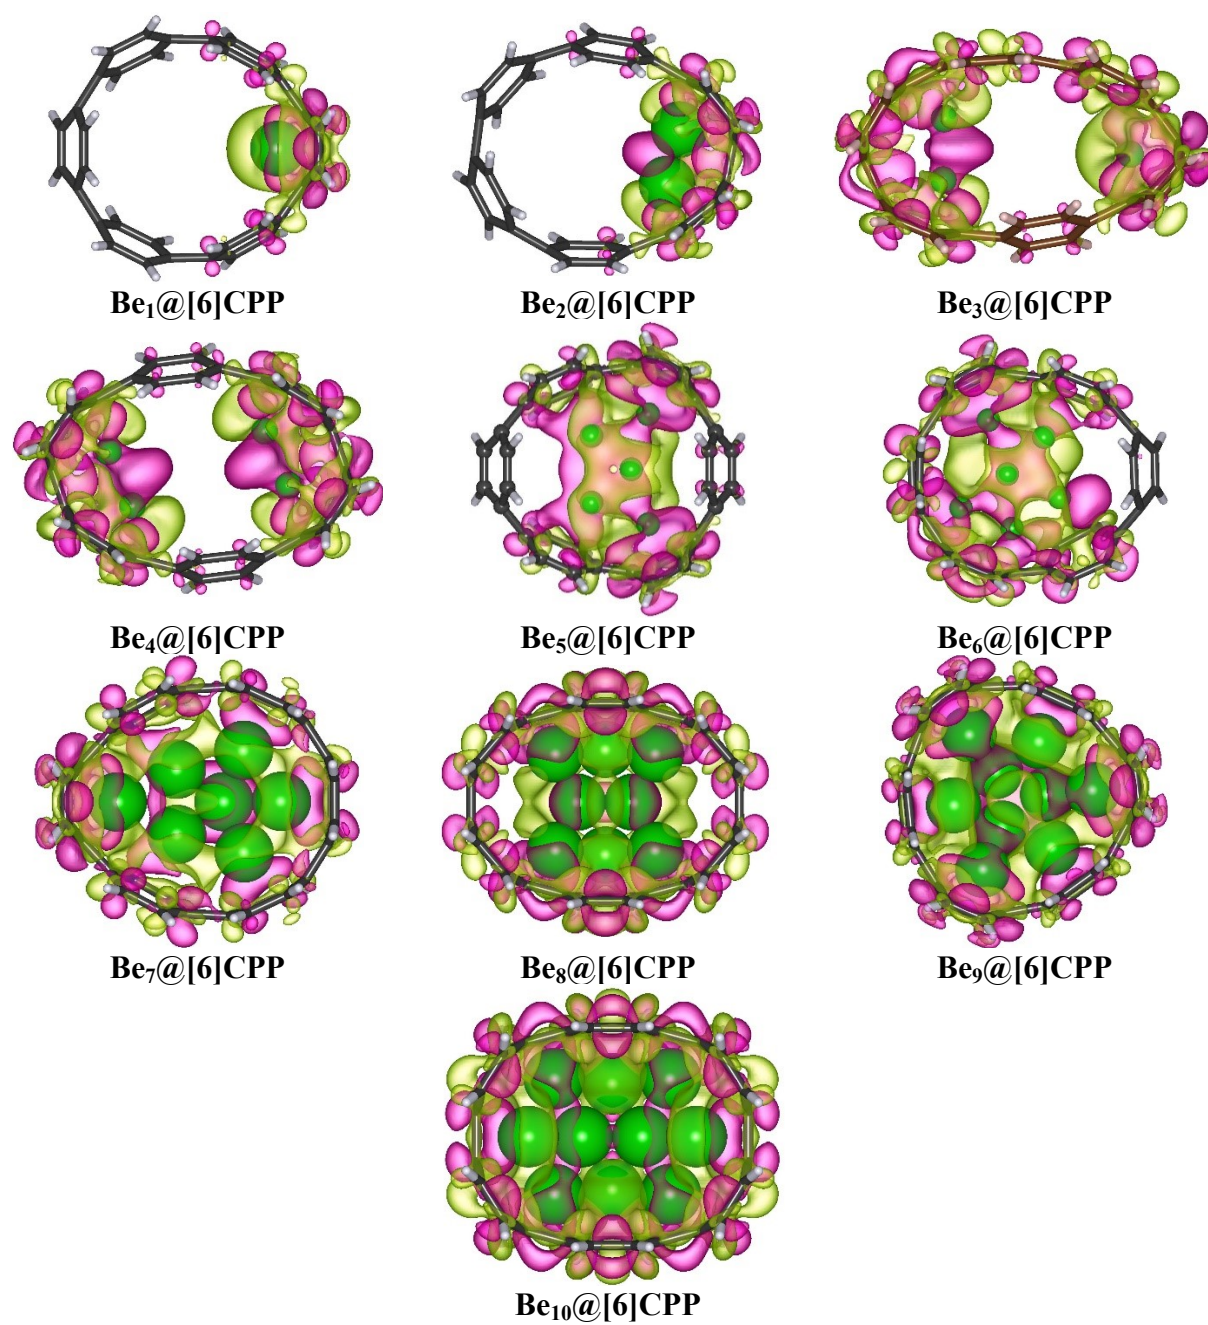

**Figure S1: The differential charge density (DCD) plots for the  $\text{Be}_n@[\text{6}]$ CPP systems**

**S3: Frontier molecular orbitals (MOs)**

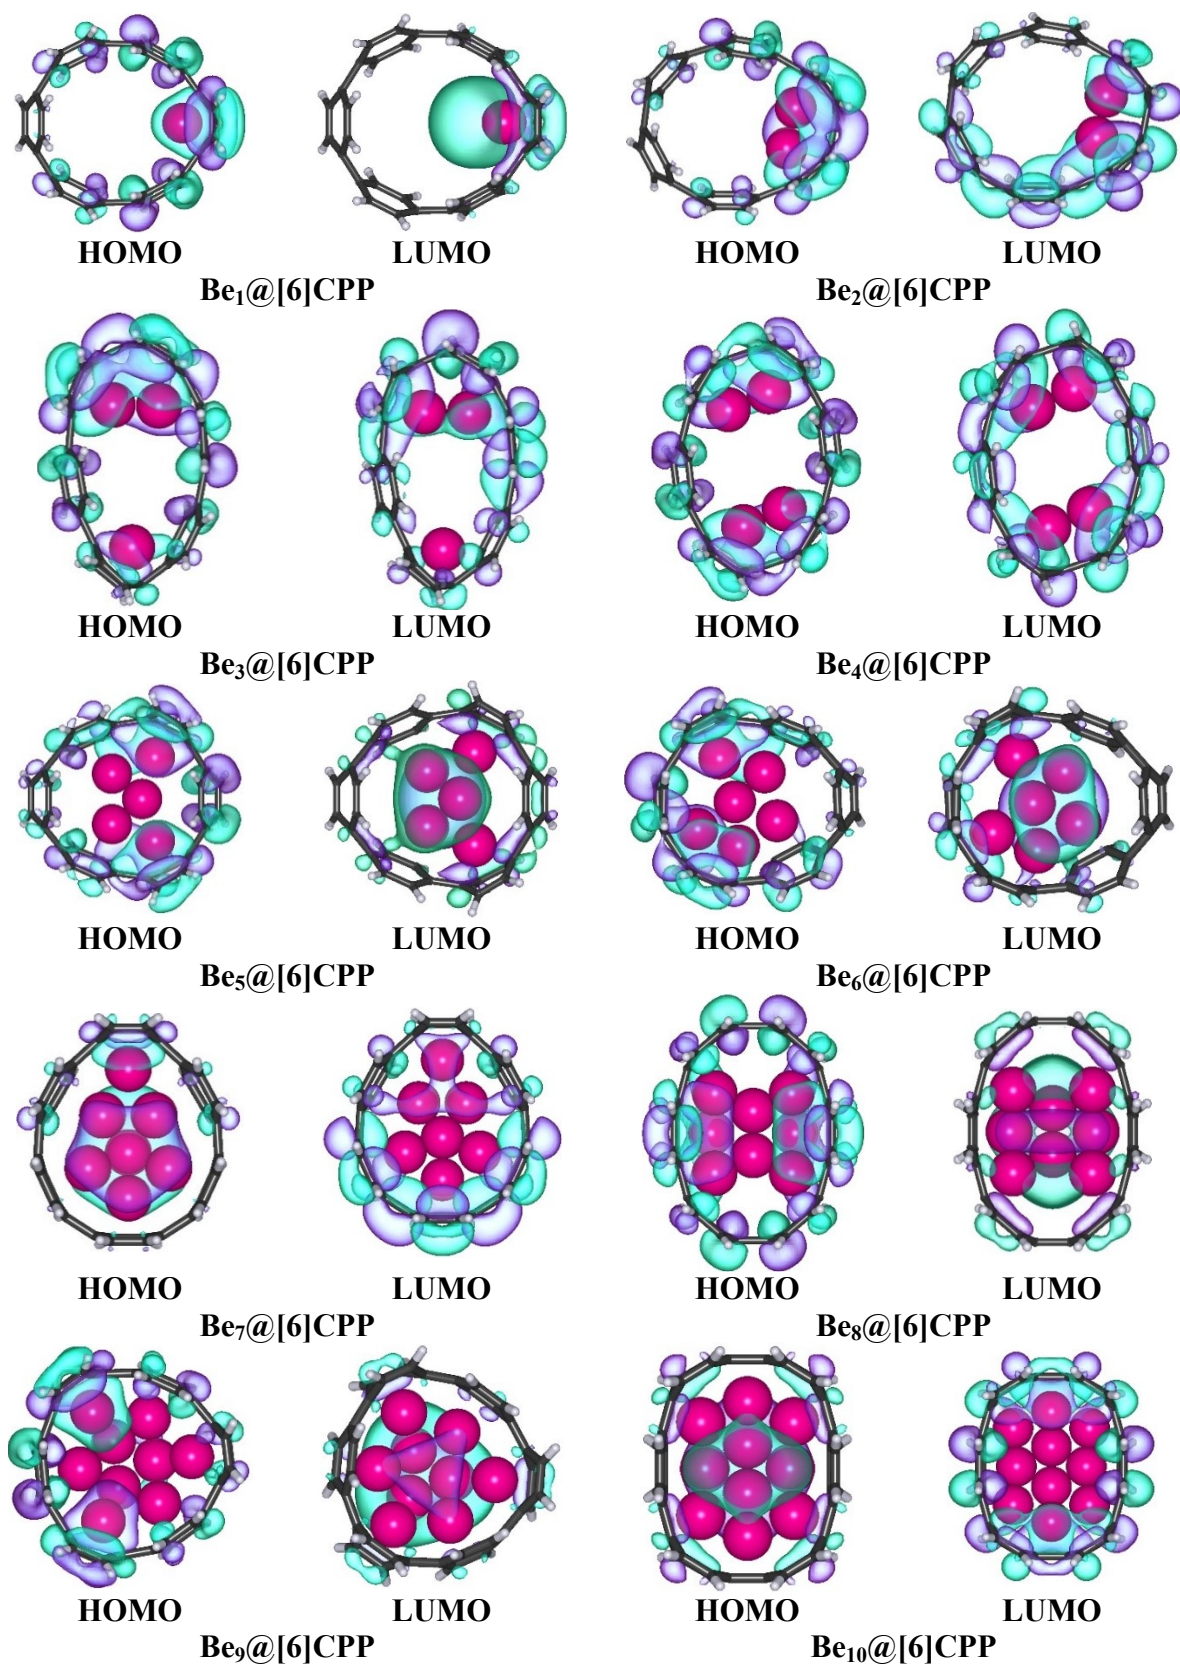

**Figure S2: The Frontier's Molecular Orbital (MOs) of Be<sub>n</sub>@[6]CPP systems.**

## S4: Photophysical properties

**Table S5: Spectral Data of the Optical Absorption in Be<sub>n</sub>@[6]CPP systems.**

| System      | Oscillatory strength | Excitation wavelength (nm) | Molar extinction coefficient (Lmol <sup>-1</sup> cm <sup>-1</sup> ) | Transition | Percentage Contribution |
|-------------|----------------------|----------------------------|---------------------------------------------------------------------|------------|-------------------------|
| Be1@[6]CPP  | 0.0048               | 682.87                     | 166.43                                                              | H → L      | 96.72                   |
|             | 0.2361               | 349.95                     | 2361.79                                                             | H-1 → L+1  | 63.79                   |
|             | 0.4811               | 342.45                     | 33297.51                                                            | H → L+1    | 93.95                   |
|             | 0.2190               | 312.04                     | 34576.49                                                            | H-1 → L+2  | 79.16                   |
|             | 0.2816               | 303.19                     | 31580.84                                                            | H → L+4    | 67.66                   |
| Be2@[6]CPP  | 0.1061               | 523.49                     | 4962.57                                                             | H → L      | 85.97                   |
|             | 0.1149               | 379.46                     | 21259.68                                                            | H → L+1    | 57.66                   |
|             | 0.1829               | 369.97                     | 23497.48                                                            | H-1 → L    | 59.98                   |
|             | 0.1560               | 358.81                     | 25093.41                                                            | H-1 → L+1  | 51.71                   |
|             | 0.1922               | 346.39                     | 25056.14                                                            | H-1 → L+1  | 68.56                   |
|             | 0.1105               | 326.55                     | 21441.27                                                            | H → L+3    | 86.40                   |
| Be3@[6]CPP  | 0.1097               | 550.31                     | 4190.99                                                             | H → L      | 95.81                   |
|             | 0.2584               | 388.50                     | 23675.41                                                            | H-1 → L    | 84.22                   |
|             | 0.1052               | 357.49                     | 29321.38                                                            | H → L+4    | 48.57                   |
|             | 0.2008               | 350.72                     | 29293.63                                                            | H-1 → L+1  | 53.97                   |
|             | 0.1658               | 331.25                     | 25417.39                                                            | H-1 → L+2  | 49.26                   |
| Be4@[6]CPP  | 0.0000               | 560.91                     | 3726.53                                                             | H → L      | 91.87                   |
|             | 0.2385               | 427.66                     | 17997.93                                                            | H → L+3    | 54.52                   |
|             | 0.2895               | 371.43                     | 23220.03                                                            | H-2 → L    | 60.87                   |
|             | 0.1898               | 350.74                     | 19544.88                                                            | H → L+6    | 49.15                   |
| Be5@[6]CPP  | 0.0117               | 930.45                     | 508.13                                                              | H → L      | 98.61                   |
|             | 0.0302               | 545.51                     | 3158.17                                                             | H-1 → L    | 76.47                   |
|             | 0.0320               | 528.07                     | 3482.22                                                             | H → L+3    | 67.19                   |
|             | 0.1726               | 383.77                     | 13035.02                                                            | H → L+5    | 62.78                   |
|             | 0.1267               | 371.41                     | 12069.88                                                            | H → L+4    | 75.49                   |
| Be6@[6]CPP  | 0.0055               | 1170.4                     | 327.91                                                              | H → L      | 98.32                   |
|             | 0.0371               | 713.80                     | 2687.18                                                             | H → L+1    | 93.00                   |
|             | 0.1051               | 513.84                     | 8123.98                                                             | H-1 → L+1  | 74.00                   |
| Be7@[6]CPP  | 0.0021               | 1163.24                    | 138.52                                                              | H → L      | 98.77                   |
|             | 0.0258               | 608.95                     | 2911.61                                                             | H-1 → L+2  | 89.57                   |
|             | 0.1205               | 469.32                     | 5870.04                                                             | H → L+4    | 53.76                   |
| Be8@[6]CPP  | 0.0034               | 1064.2                     | 578.52                                                              | H → L      | 98.94                   |
|             | 0.0278               | 669.26                     | 1962.37                                                             | H → L+1    | 97.83                   |
|             | 0.0460               | 440.82                     | 2617.45                                                             | H → L+4    | 68.94                   |
| Be9@[6]CPP  | 0.0024               | 1235.86                    | 289.14                                                              | H → L      | 77.12                   |
|             | 0.0216               | 487.27                     | 5001.12                                                             | H-1 → L+3  | 54.42                   |
|             | 0.1263               | 473.88                     | 5057.98                                                             | H → L+3    | 45.35                   |
|             | 0.1263               | 473.88                     | 5057.98                                                             | H-1 → L+2  | 45.15                   |
| Be10@[6]CPP | 0.0001               | 1200.56                    | 503.61                                                              | H → L      | 99.18                   |
|             | 0.0474               | 734.10                     | 2412.31                                                             | H → L+2    | 94.07                   |
|             | 0.2567               | 468.43                     | 9469.96                                                             | H → L+4    | 61.37                   |

## S5: AIMD Simulations

In contrast to the graphene, the atomically thin freestanding layer of metals are thermodynamically unstable. Further, the metals prefer clustering even for the small number of metal atoms due to non-directional nature of the metallic bonding. Despite of this, Rümmeli and co-workers have provided the experimental proofs on the existence of ultrathin metallic structures inside the nanopore of graphene.<sup>1</sup> Likewise, the patches of molybdenum were also achieved by selective removal of selenium atoms from the MoSe<sub>2</sub> monolayer.<sup>2</sup> This indicates that the template-assisted growth could be the promising strategy to stabilize an ultrathin metallic nanostructure. However, the atomically thin metal layers are certainly the metastable structures which occupies one of the local minima on the potential energy surface while three-dimensional (3D) clusters locate at the global minimum. Therefore, we cannot expect the stability of these atomically thin metallic framework in a wider temperature range.

AIMD simulations performed at 300K reveals that the Be<sub>9</sub>@[6]CPP and Be<sub>10</sub>@[6]CPP systems are stable at room temperature. Thereafter, attention has been focussed to assess the stability of the studied systems in a wider thermal range and thus the AIMD simulations were performed for Be<sub>5</sub>@[6]CPP, Be<sub>9</sub>@[6]CPP and Be<sub>10</sub>@[6]CPP systems at 300K, 500K and 750K. The geometry of the systems at different time intervals and the variation in energy during the course of simulations are depicted in Figure S3 and Figure S4.

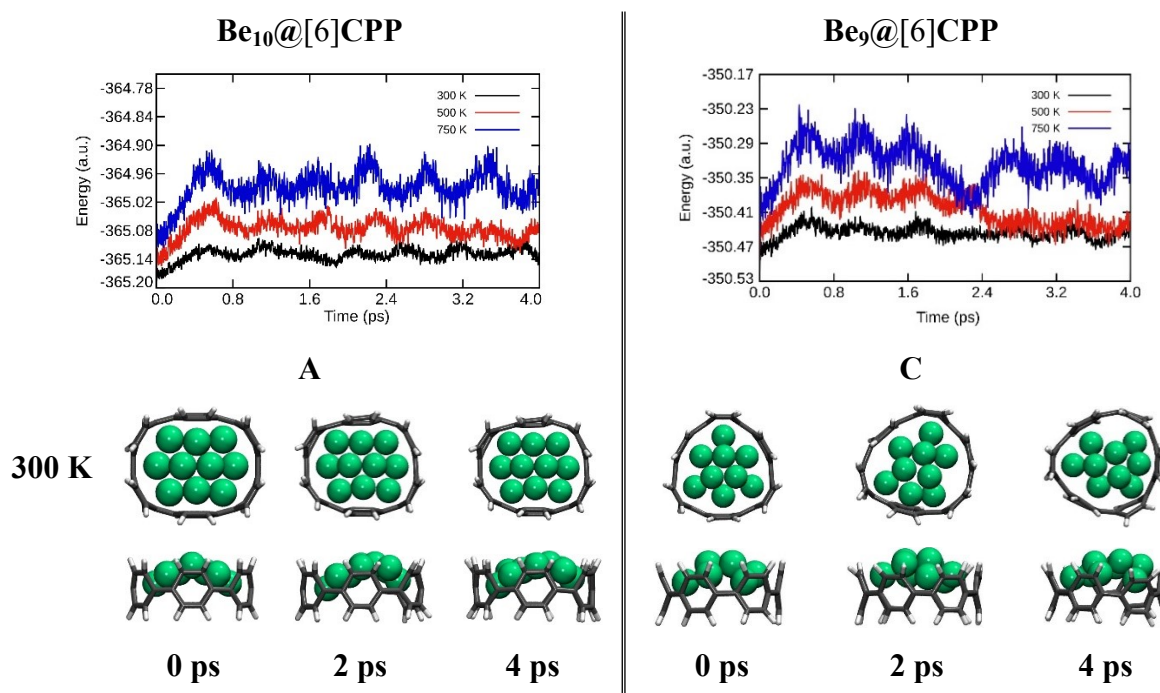

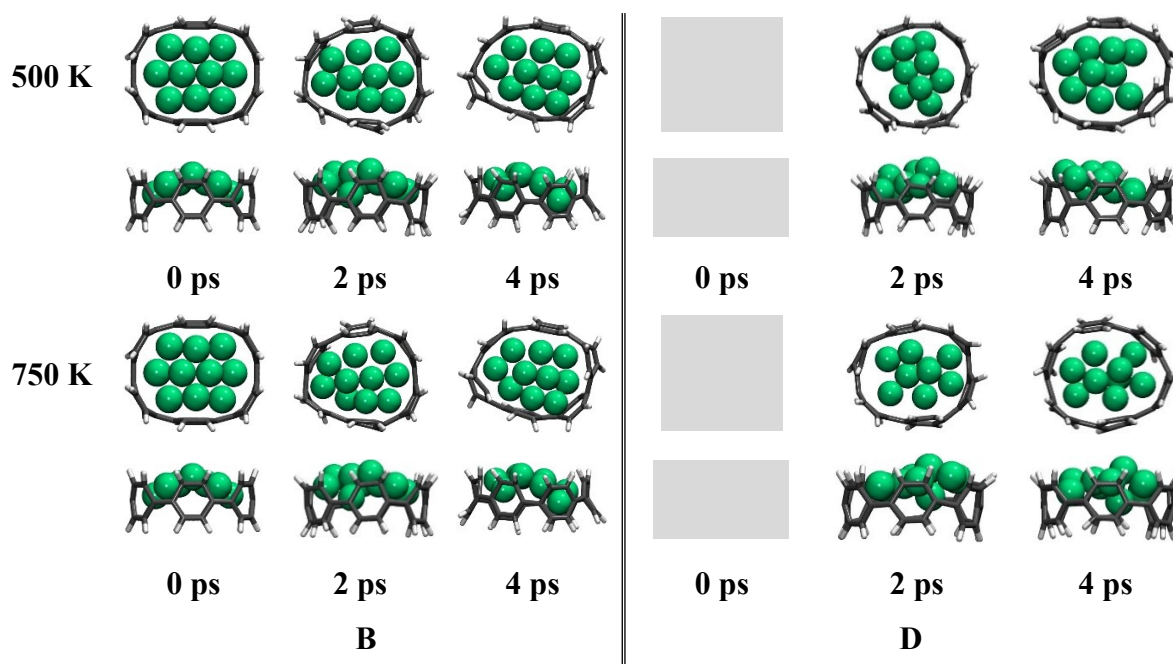

**Figure S3.** Outcomes of the AIMD simulations. (A) Variation in energy of Be<sub>10</sub>@[6]CPP at different temperature, (B) Geometry of Be<sub>10</sub>@CPP system obtained during the simulations, (C) Variation in energy of Be<sub>9</sub>@[6]CPP at different temperature, and (D) Geometry of Be<sub>9</sub>@[6]CPP system obtained during the simulations.

The ultrathin Be<sub>10</sub> morphology in Be<sub>10</sub>@[6]CPP system is maintained with only minor atomic fluctuations during the simulation time of 4 ps at 300K. However, a small space is created inside the Be<sub>9</sub>@[6]CPP system even at 300K. Upon increasing the T, the energy of the systems and fluctuation in energy increases. Further, enhanced fluctuation in atomic positions inside the cavity of [6]CPP is observed and the ultrathin structure gets deformed. The distortion is more pronounced in the Be membrane of Be<sub>9</sub>@[6]CPP system. Therefore, a significant difference in the energy of the Be<sub>9</sub>@[6]CPP system is noticed around 2.4 ps at higher T. It is worth to mention that the systems essentially resist the complete clustering of Be due to strong interactions between the [6]CPP and Be atoms. Interestingly, the AIMD simulations performed for the Be<sub>5</sub>@[6]CPP system illustrates the stability of planar Be<sub>5</sub> cluster even at 750K. It has been observed that Be<sub>5</sub> cluster gets tilted inside the cavity of the [6]CPP and regains its position retaining the planarity (Figure S4). Therefore, the AIMD simulations unveils that the [6]CPP can stabilize an ultrathin B<sub>10</sub> cluster at room temperature and favours slight deformation at higher T range. Noteworthy, the [6]CPP cavity promises to stabilize a few atoms Be cluster (like Be<sub>5</sub>) even at 750K with only marginal fluctuations in planarity.

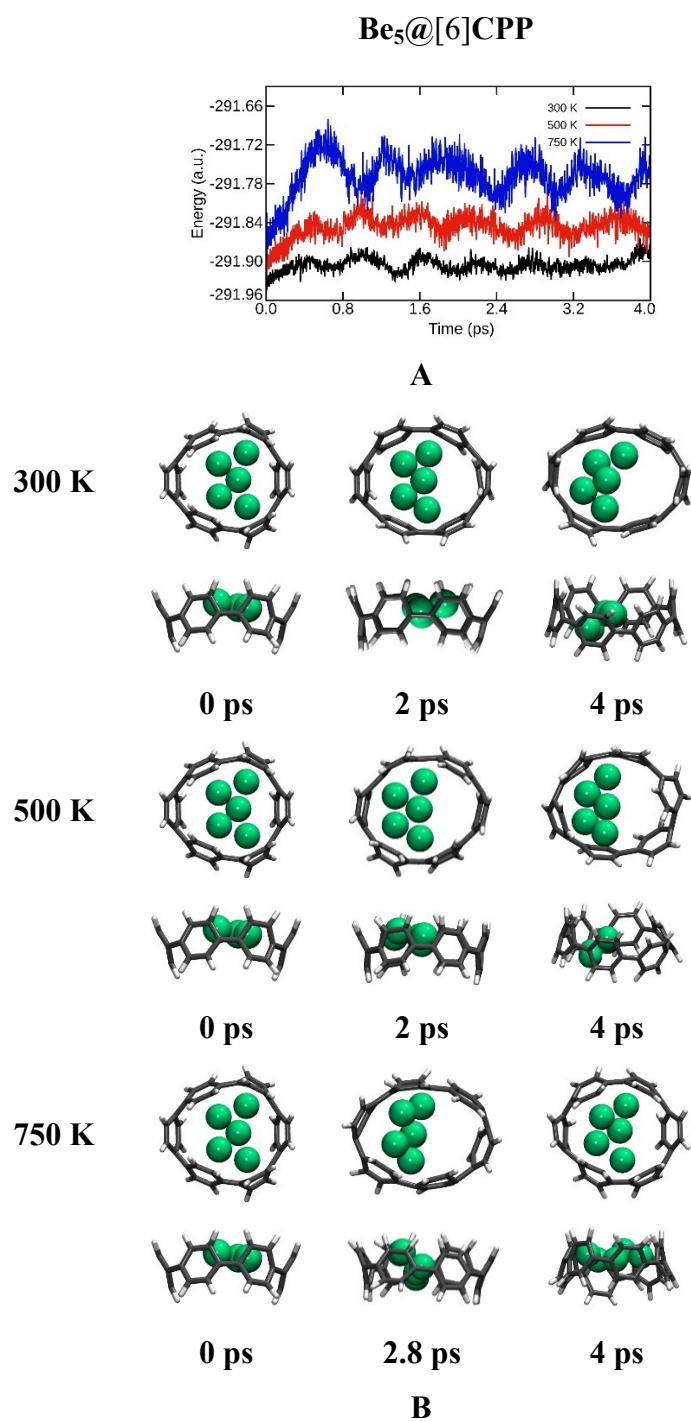

**Figure S4.** Outcomes of the AIMD simulations. (A) Variation in energy of Be<sub>5</sub>@[6]CPP at different temperature, (B) Geometry of Be<sub>5</sub>@[6]CPP system obtained during the simulations.



### S6: Potential of the systems towards CO<sub>2</sub> activation

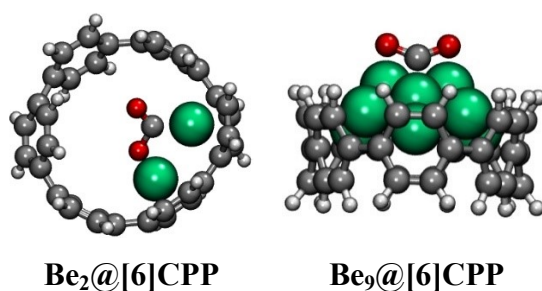

**Figure S5.** Optimized geometry of CO<sub>2</sub> molecule adsorbed on Be<sub>2</sub>@[6]CPP and Be<sub>9</sub>@[6]CPP systems.

### S7: 2D vs 3D stability

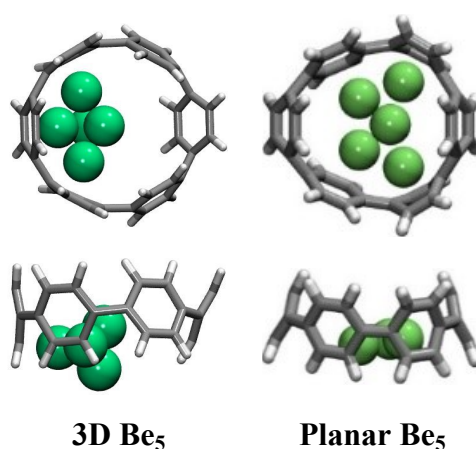

**Figure S6.** Top and side view of the optimized geometry of 3D and planar Be<sub>5</sub> cluster inside the cavity of [6]CPP.

The most stable 3D Be<sub>5</sub> cluster reported in a recent work was considered as an initial guess inside the [6]CPP cavity during geometry optimization.<sup>3</sup> The free energy ( $\Delta G$ ) difference between the encapsulated systems with planar and 3D Be<sub>5</sub> arrangement calculated with the M062X/6-311+G\*\* level of theory is found to be -13.16 kcal/mol. Therefore, it is worth to mention that the planar Be<sub>5</sub> cluster is favoured over the 3D cluster inside the [6]CPP cavity. This indicates that the 3D cluster occupies minima lower than the 3D cluster in the gas phase. In contrast to this, the system with planar Be<sub>5</sub> cavity occupies minima lower than the 3D cluster when encapsulated inside the [6]CPP cavity. This may be attributed to the stronger electrostatic and orbital interaction of the Be atoms with the [6]CPP architecture. The size of the planar Be<sub>5</sub> cluster achieved inside the [6]CPP resembles the other metal patches experimentally observed inside a nanopore of graphene. This suggests that the [6]CPP could serve as a promising template to stabilize a few Be atoms cluster in an atomically thin arrangement.

## Cartesian Coordinates of optimized Be<sub>n</sub>@[6]CPP systems

### 1. Be<sub>1</sub>@[6]CPP

|   |             |             |             |
|---|-------------|-------------|-------------|
| C | -0.84129600 | -3.92389200 | -0.15441100 |
| C | -1.68766300 | -4.08441900 | 0.95511100  |
| C | -2.92603700 | -3.45793600 | 1.00490900  |
| C | -3.36913400 | -2.65633800 | -0.05813300 |
| C | -2.66339400 | -2.76731200 | -1.26199700 |
| C | -1.42462000 | -3.38814800 | -1.30883600 |
| H | -1.32931600 | -4.60379300 | 1.83691700  |
| H | -3.49771400 | -3.49579200 | 1.92607400  |
| H | -2.98397200 | -2.19702700 | -2.12562600 |
| H | -0.83600200 | -3.28006800 | -2.21156600 |
| C | 0.64103900  | -3.89257900 | -0.03527300 |
| C | 1.47848400  | -3.81386700 | -1.15827700 |
| C | 1.20764200  | -3.50938200 | 1.18836200  |
| C | 2.69071300  | -3.13833200 | -1.10642600 |
| H | 1.13830900  | -4.19792800 | -2.11384800 |
| C | 2.42653500  | -2.85220900 | 1.25088400  |
| H | 0.62328300  | -3.58593300 | 2.09774400  |
| C | 3.11615900  | -2.50713000 | 0.07809600  |
| H | 3.25132700  | -3.00366100 | -2.02572500 |
| H | 2.75448100  | -2.44346900 | 2.19990400  |
| C | 3.96733200  | -1.29765500 | 0.08403000  |
| C | 4.51389900  | -0.67124400 | 1.32708400  |
| C | 4.56522500  | -0.70508700 | -1.14051700 |
| C | 4.51443200  | 0.66917000  | 1.32710200  |
| H | 4.97321800  | -1.27366600 | 2.10594400  |
| C | 4.56577300  | 0.70302900  | -1.14050200 |
| H | 4.87053300  | -1.27206900 | -2.01272600 |
| C | 3.96837200  | 1.29602300  | 0.08405800  |
| H | 4.97423700  | 1.27119800  | 2.10597700  |
| H | 4.87144500  | 1.26976900  | -2.01274200 |
| C | -4.15556400 | -1.40875400 | 0.14253600  |
| C | -4.71874200 | -0.69280800 | -0.92640900 |
| C | -3.91827100 | -0.69299700 | 1.32124500  |
| C | -4.71836400 | 0.69503000  | -0.92640300 |
| H | -5.03519900 | -1.21944200 | -1.82038800 |
| C | -3.91789200 | 0.69476600  | 1.32125100  |
| H | -3.52139200 | -1.20512700 | 2.18966400  |
| C | -4.15479400 | 1.41066100  | 0.14254700  |
| H | -5.03453300 | 1.22184400  | -1.82037800 |
| H | -3.52073100 | 1.20667300  | 2.18967200  |

|    |             |             |             |
|----|-------------|-------------|-------------|
| C  | -0.83923600 | 3.92415100  | -0.15442000 |
| C  | -1.68551500 | 4.08508300  | 0.95511200  |
| C  | -1.42282300 | 3.38865800  | -1.30883000 |
| C  | -2.92419100 | 3.45919800  | 1.00492500  |
| H  | -1.32691300 | 4.60429400  | 1.83691000  |
| C  | -2.66189800 | 2.76842600  | -1.26197700 |
| H  | -0.83426700 | 3.28028600  | -2.21156500 |
| C  | -3.36769700 | 2.65782300  | -0.05811500 |
| H  | -3.49584300 | 3.49733800  | 1.92609400  |
| H  | -2.98276000 | 2.19828900  | -2.12559800 |
| C  | 0.64308500  | 3.89222600  | -0.03531400 |
| C  | 1.48046400  | 3.81310300  | -1.15833500 |
| C  | 1.20958900  | 3.50890700  | 1.18833400  |
| C  | 2.69244000  | 3.13711400  | -1.10647700 |
| H  | 1.14041700  | 4.19723500  | -2.11392400 |
| C  | 2.42823500  | 2.85128500  | 1.25087700  |
| H  | 0.62529800  | 3.58577300  | 2.09773400  |
| C  | 3.11768300  | 2.50582500  | 0.07808600  |
| H  | 3.25299300  | 3.00218500  | -2.02577500 |
| H  | 2.75607400  | 2.44251700  | 2.19992000  |
| Be | 3.04680700  | -0.00043300 | -0.62901900 |

## 2. Be<sub>2</sub>@[6]CPP

|   |             |             |             |
|---|-------------|-------------|-------------|
| C | -3.29412300 | -2.76343000 | 0.14905300  |
| C | -3.47673500 | -2.02463600 | 1.32337500  |
| C | -4.12827100 | -0.80125600 | 1.29671400  |
| C | -4.61357900 | -0.27487100 | 0.09343300  |
| C | -4.74387300 | -1.17630200 | -0.97599400 |
| C | -4.09167800 | -2.40104200 | -0.94900200 |
| H | -2.92530500 | -2.28671900 | 2.21803200  |
| H | -4.05042600 | -0.16452000 | 2.16941900  |
| H | -5.23103700 | -0.86096600 | -1.89236000 |
| H | -4.09231400 | -3.01498400 | -1.84319100 |
| C | -2.00653200 | -3.49084000 | -0.00570100 |
| C | -1.31482100 | -3.33593100 | -1.21519800 |
| C | -1.25434400 | -3.93264200 | 1.09070500  |
| C | 0.06873800  | -3.35913700 | -1.25888900 |
| H | -1.84958700 | -3.02288400 | -2.10360400 |
| C | 0.13439500  | -3.94462000 | 1.05102600  |
| H | -1.75046700 | -4.16577000 | 2.02638600  |
| C | 0.82920300  | -3.52324400 | -0.09158900 |
| H | 0.55040600  | -3.07724400 | -2.18997300 |
| H | 0.67441400  | -4.19631500 | 1.95588500  |
| C | 2.21046900  | -2.98412800 | -0.03337100 |
| C | 2.86287400  | -2.63542500 | 1.22046200  |
| C | 3.03347400  | -2.81980900 | -1.18185000 |

|    |             |             |             |
|----|-------------|-------------|-------------|
| C  | 3.94209300  | -1.81536000 | 1.26652400  |
| H  | 2.45131200  | -3.02012900 | 2.14598100  |
| C  | 4.03590700  | -1.84652100 | -1.17924900 |
| H  | 2.77102700  | -3.30136600 | -2.11782700 |
| C  | 4.29825100  | -1.08955400 | 0.05118500  |
| H  | 4.40622000  | -1.56555000 | 2.21131700  |
| H  | 4.58526300  | -1.63174000 | -2.08541700 |
| C  | -4.42271800 | 1.18741100  | -0.11289900 |
| C  | -3.78779100 | 1.56821300  | -1.30150800 |
| C  | -4.34370500 | 2.09226200  | 0.95818400  |
| C  | -2.85588500 | 2.59501500  | -1.31225000 |
| H  | -3.84842800 | 0.92678800  | -2.17229700 |
| C  | -3.40959700 | 3.11854800  | 0.94776000  |
| H  | -4.91342200 | 1.90972100  | 1.86307500  |
| C  | -2.52703900 | 3.27394000  | -0.13395100 |
| H  | -2.23544800 | 2.71304900  | -2.19248500 |
| H  | -3.27648200 | 3.71817700  | 1.84174900  |
| C  | 1.68176400  | 3.23651200  | 0.14536200  |
| C  | 0.88592000  | 3.14860500  | 1.29611200  |
| C  | 1.08185300  | 3.80680000  | -0.99033500 |
| C  | -0.47993000 | 3.37213800  | 1.24050900  |
| H  | 1.30431600  | 2.74185300  | 2.20919400  |
| C  | -0.28666300 | 4.03382700  | -1.04203200 |
| H  | 1.66771700  | 3.98919800  | -1.88419700 |
| C  | -1.11711700 | 3.70881000  | 0.03925600  |
| H  | -1.07674800 | 3.12488200  | 2.11053700  |
| H  | -0.72459700 | 4.38183600  | -1.97146600 |
| C  | 2.96164700  | 2.49754400  | 0.10110500  |
| C  | 3.68961900  | 2.24266400  | -1.10702200 |
| C  | 3.68190900  | 2.10881200  | 1.32458900  |
| C  | 4.48328000  | 1.09686200  | -1.17100800 |
| H  | 3.48333000  | 2.79000100  | -2.02018700 |
| C  | 4.53985700  | 1.07260800  | 1.30109500  |
| H  | 3.54889100  | 2.70890900  | 2.21945200  |
| C  | 4.56237600  | 0.27846200  | 0.05601700  |
| H  | 4.97351800  | 0.81494100  | -2.09360800 |
| H  | 5.15665600  | 0.81266700  | 2.15316700  |
| Be | 2.21193400  | -1.16947000 | -0.80826500 |
| Be | 2.64452200  | 0.75808000  | -0.66706000 |

### 3. Be<sub>3</sub>@[6]CPP

|   |             |            |             |
|---|-------------|------------|-------------|
| C | -2.43821700 | 2.75729900 | 0.10635800  |
| C | -1.59640000 | 2.88480800 | 1.25706600  |
| C | -0.23287400 | 2.97171400 | 1.14797600  |
| C | 0.44733100  | 2.98095900 | -0.10182200 |

|   |             |             |             |
|---|-------------|-------------|-------------|
| C | -0.35970800 | 3.02743900  | -1.22252200 |
| C | -1.75695600 | 2.86659700  | -1.14995500 |
| H | -2.04322400 | 2.82333400  | 2.24152500  |
| H | 0.34086300  | 2.97163100  | 2.06688300  |
| H | 0.07522700  | 3.10420600  | -2.21173100 |
| H | -2.32465800 | 2.91937900  | -2.07225900 |
| C | -3.71913600 | 2.09518300  | 0.16330200  |
| C | -4.43837200 | 1.74453500  | -1.06277300 |
| C | -4.32274200 | 1.55904300  | 1.38219000  |
| C | -5.12917100 | 0.57208900  | -1.11398300 |
| H | -4.41765500 | 2.40346000  | -1.92502600 |
| C | -5.02761200 | 0.41125600  | 1.32586800  |
| H | -4.19411800 | 2.07909500  | 2.32566900  |
| C | -5.01883400 | -0.30513500 | 0.04041000  |
| H | -5.63264500 | 0.26090600  | -2.02243600 |
| H | -5.47873700 | -0.01943400 | 2.21136600  |
| C | -4.43415200 | -1.55264400 | -0.05246200 |
| C | -4.02301400 | -2.30484400 | 1.14583800  |
| C | -3.88620200 | -2.10999500 | -1.30497600 |
| C | -2.77084800 | -2.80055100 | 1.17015400  |
| H | -4.68343000 | -2.37832600 | 2.00067000  |
| C | -2.64422200 | -2.74628400 | -1.24950600 |
| H | -4.39246400 | -1.97362800 | -2.25123000 |
| C | -1.92059800 | -2.75339700 | -0.01946100 |
| H | -2.37804600 | -3.27168500 | 2.06534200  |
| H | -2.15972500 | -3.01778700 | -2.18102500 |
| C | 1.90087200  | 2.70462600  | -0.18176200 |
| C | 2.48398800  | 2.23228800  | -1.33182200 |
| C | 2.74308600  | 2.74108500  | 0.98104000  |
| C | 3.75247800  | 1.58136100  | -1.35542700 |
| H | 1.94625000  | 2.25997900  | -2.27231800 |
| C | 3.96242500  | 2.14174500  | 1.03384400  |
| H | 2.39556300  | 3.25805000  | 1.86844300  |
| C | 4.48254200  | 1.39366700  | -0.08973900 |
| H | 4.26299500  | 1.47204300  | -2.30582900 |
| H | 4.55021700  | 2.17851000  | 1.94225900  |
| C | 3.69387900  | -1.74480900 | 0.15264200  |
| C | 4.42721300  | -1.43775800 | 1.41354400  |
| C | 4.56676500  | -1.74678600 | -1.01649200 |
| C | 5.33877300  | -0.45614800 | 1.37636200  |
| H | 4.28039300  | -2.07921800 | 2.27873600  |
| C | 5.44823300  | -0.66817400 | -1.09529500 |
| H | 4.43393700  | -2.42940200 | -1.84993200 |
| C | 5.32144400  | 0.26562800  | 0.06647500  |
| H | 6.05020200  | -0.25485500 | 2.16837100  |
| H | 6.06470200  | -0.48616300 | -1.96767700 |

|    |             |             |             |
|----|-------------|-------------|-------------|
| C  | 2.35596900  | -2.38549400 | 0.17089000  |
| C  | 1.74746500  | -2.94122700 | -0.96225900 |
| C  | 1.54740400  | -2.22453900 | 1.30377100  |
| C  | 0.37959800  | -3.18756300 | -1.00489700 |
| H  | 2.32970600  | -3.12710000 | -1.85853300 |
| C  | 0.18477200  | -2.46188500 | 1.25862600  |
| H  | 1.97273600  | -1.79829800 | 2.20548000  |
| C  | -0.44934300 | -2.88052900 | 0.08072600  |
| H  | -0.04717800 | -3.56816200 | -1.92639700 |
| H  | -0.41342500 | -2.20568800 | 2.12559200  |
| Be | -2.41996400 | -0.98895800 | -0.67105100 |
| Be | -2.38518600 | 1.01908400  | -0.63274200 |
| Be | 3.74702400  | -0.14567300 | -0.75308700 |

#### 4. Be<sub>4</sub>@[6]CPP

|   |             |             |             |
|---|-------------|-------------|-------------|
| C | 2.13558900  | -2.98147000 | 0.13620300  |
| C | 1.40659300  | -2.86247000 | 1.32896100  |
| C | 0.03242700  | -3.02495900 | 1.35276800  |
| C | -0.68808200 | -3.33607400 | 0.19167700  |
| C | 0.06736300  | -3.68614600 | -0.93584200 |
| C | 1.44520800  | -3.51314900 | -0.96386200 |
| H | 1.89704900  | -2.48370000 | 2.21840200  |
| H | -0.49101600 | -2.76874800 | 2.26560300  |
| H | -0.42361200 | -4.01190500 | -1.84631900 |
| H | 1.96703900  | -3.70620300 | -1.89433700 |
| C | 3.42611900  | -2.27435900 | 0.01523600  |
| C | 4.05176200  | -1.98588500 | -1.24690800 |
| C | 4.23538900  | -1.89526200 | 1.18791000  |
| C | 4.77766700  | -0.79972200 | -1.35287600 |
| H | 3.81221600  | -2.54195700 | -2.14683100 |
| C | 5.02772200  | -0.81247100 | 1.11504900  |
| H | 4.22515900  | -2.53908800 | 2.06303100  |
| C | 4.86456500  | 0.00419800  | -0.11249300 |
| H | 5.19952400  | -0.48297400 | -2.29822900 |
| H | 5.73200600  | -0.54519300 | 1.89442000  |
| C | 4.41325400  | 1.32201600  | -0.05367100 |
| C | 4.08964800  | 1.97575300  | 1.20819600  |
| C | 3.96726700  | 2.08731600  | -1.22495700 |
| C | 2.92896100  | 2.67345700  | 1.28075500  |
| H | 4.67004500  | 1.76888500  | 2.09743600  |
| C | 2.87331600  | 2.95341200  | -1.10723400 |
| H | 4.45597200  | 1.95810700  | -2.18084500 |
| C | 2.12965500  | 2.97966700  | 0.10580600  |
| H | 2.58087100  | 3.02250600  | 2.24610900  |
| H | 2.48235800  | 3.41254800  | -2.00866900 |

|    |             |             |             |
|----|-------------|-------------|-------------|
| C  | -2.12965600 | -2.97966500 | 0.10571600  |
| C  | -2.87329800 | -2.95339000 | -1.10733500 |
| C  | -2.92898100 | -2.67347400 | 1.28065800  |
| C  | -3.96724600 | -2.08729100 | -1.22506100 |
| H  | -2.48232800 | -3.41251300 | -2.00877200 |
| C  | -4.08966600 | -1.97576800 | 1.20809100  |
| H  | -2.58090600 | -3.02253800 | 2.24601200  |
| C  | -4.41325100 | -1.32201000 | -0.05377000 |
| H  | -4.45593600 | -1.95806600 | -2.18095500 |
| H  | -4.67007700 | -1.76891400 | 2.09732500  |
| C  | -3.42611900 | 2.27435500  | 0.01521700  |
| C  | -4.23541400 | 1.89524400  | 1.18786800  |
| C  | -4.05173700 | 1.98590500  | -1.24694500 |
| C  | -5.02774900 | 0.81245600  | 1.11497400  |
| H  | -4.22520000 | 2.53905700  | 2.06299900  |
| C  | -4.77764600 | 0.79974800  | -1.35294700 |
| H  | -3.81217200 | 2.54199200  | -2.14685400 |
| C  | -4.86456700 | -0.00419300 | -0.11257800 |
| H  | -5.73205200 | 0.54516800  | 1.89432500  |
| H  | -5.19948600 | 0.48301600  | -2.29831300 |
| C  | -2.13559000 | 2.98146200  | 0.13622100  |
| C  | -1.44519200 | 3.51317000  | -0.96381900 |
| C  | -1.40661400 | 2.86242900  | 1.32898700  |
| C  | -0.06734800 | 3.68617000  | -0.93577200 |
| H  | -1.96700900 | 3.70624800  | -1.89429700 |
| C  | -0.03244800 | 3.02492000  | 1.35282100  |
| H  | -1.89708300 | 2.48363400  | 2.21840900  |
| C  | 0.68807900  | 3.33606900  | 0.19175000  |
| H  | 0.42364200  | 4.01195400  | -1.84623200 |
| H  | 0.49098100  | 2.76868400  | 2.26565700  |
| Be | 2.99158200  | -0.56061600 | -0.68307400 |
| Be | 2.20183700  | 1.24202100  | -0.80585500 |
| Be | -2.99158100 | 0.56061800  | -0.68311000 |
| Be | -2.20180500 | -1.24200600 | -0.80592100 |

##### 5. Be<sub>5</sub>@[6]CPP

|   |            |             |             |
|---|------------|-------------|-------------|
| C | 3.86766700 | 1.40243400  | 0.38327200  |
| C | 3.63038300 | 0.69318200  | 1.57048400  |
| C | 3.63036700 | -0.69330100 | 1.57048600  |
| C | 3.86763200 | -1.40256100 | 0.38327400  |
| C | 4.48355500 | -0.69406800 | -0.65588600 |
| C | 4.48357300 | 0.69392300  | -0.65588700 |
| H | 3.23072300 | 1.21689600  | 2.43302300  |
| H | 3.23069200 | -1.21700400 | 2.43302500  |
| H | 4.82448900 | -1.21256200 | -1.54498500 |

|   |             |             |             |
|---|-------------|-------------|-------------|
| H | 4.82452100  | 1.21240700  | -1.54498600 |
| C | 3.09063300  | 2.63554100  | 0.12046100  |
| C | 2.79067300  | 3.05096900  | -1.21292400 |
| C | 2.67503600  | 3.58554400  | 1.17352700  |
| C | 1.55587100  | 3.67804900  | -1.41729800 |
| H | 3.36853200  | 2.72067900  | -2.06832600 |
| C | 1.53380800  | 4.26956500  | 0.99803900  |
| H | 3.34331900  | 3.76693000  | 2.01052800  |
| C | 0.74766800  | 3.87685400  | -0.19741600 |
| H | 1.22514200  | 3.98745600  | -2.40179600 |
| H | 1.23053400  | 5.08193100  | 1.65025300  |
| C | -0.64607800 | 3.66722600  | -0.21525200 |
| C | -1.47023600 | 3.89168200  | 0.93453400  |
| C | -1.30444700 | 3.04467400  | -1.35490200 |
| C | -2.70973500 | 3.32768000  | 1.05298500  |
| H | -1.06733100 | 4.47204900  | 1.75545900  |
| C | -2.60396400 | 2.48985200  | -1.18901300 |
| H | -0.91116400 | 3.18060800  | -2.35627700 |
| C | -3.27319400 | 2.51173000  | 0.03031800  |
| H | -3.26574200 | 3.46700000  | 1.97449400  |
| H | -3.03991500 | 1.95757900  | -2.02793000 |
| C | 3.09055800  | -2.63564400 | 0.12046300  |
| C | 2.79058200  | -3.05106500 | -1.21292000 |
| C | 2.67491600  | -3.58562300 | 1.17353300  |
| C | 1.55575100  | -3.67808900 | -1.41729300 |
| H | 3.36845300  | -2.72079900 | -2.06832300 |
| C | 1.53365800  | -4.26959400 | 0.99804500  |
| H | 3.34318700  | -3.76703300 | 2.01053700  |
| C | 0.74753700  | -3.87685800 | -0.19741300 |
| H | 1.22500800  | -3.98748300 | -2.40179100 |
| H | 1.23034600  | -5.08194100 | 1.65026500  |
| C | -3.27329500 | -2.51164100 | 0.03030700  |
| C | -2.70985600 | -3.32760400 | 1.05297700  |
| C | -2.60406500 | -2.48977900 | -1.18902100 |
| C | -1.47036800 | -3.89162800 | 0.93453100  |
| H | -3.26587000 | -3.46691500 | 1.97448300  |
| C | -1.30455400 | -3.04462500 | -1.35490700 |
| H | -3.03999800 | -1.95748900 | -2.02793600 |
| C | -0.64620300 | -3.66719100 | -0.21525400 |
| H | -1.06747900 | -4.47200500 | 1.75545600  |
| H | -0.91127900 | -3.18058300 | -2.35628200 |
| C | -4.18837700 | -1.38951200 | 0.32200300  |
| C | -4.83701700 | -0.69212600 | -0.71026500 |
| C | -3.96367900 | -0.69333200 | 1.51476500  |
| C | -4.83698600 | 0.69227900  | -0.71026300 |
| H | -5.18022100 | -1.22477200 | -1.59099000 |



|    |             |             |             |
|----|-------------|-------------|-------------|
| C  | -3.96364900 | 0.69344000  | 1.51476700  |
| H  | -3.53892400 | -1.20557500 | 2.37043100  |
| C  | -4.18831700 | 1.38963400  | 0.32200800  |
| H  | -5.18016800 | 1.22494300  | -1.59098500 |
| H  | -3.53887200 | 1.20566200  | 2.37043600  |
| Be | 1.33279500  | 2.06966200  | -0.56951400 |
| Be | -0.80136600 | 1.25361900  | -0.90967800 |
| Be | -0.80138600 | -1.25360700 | -0.90968800 |
| Be | 1.33275400  | -2.06968300 | -0.56952100 |
| Be | 0.69393300  | -0.00000700 | -0.58584100 |

## 6. Be<sub>6</sub>@I6|CPP

|   |             |             |             |
|---|-------------|-------------|-------------|
| C | -3.95783400 | -1.50766000 | 0.34549500  |
| C | -4.04436600 | -0.70407300 | 1.54278200  |
| C | -4.01594400 | 0.65326500  | 1.44823800  |
| C | -3.98239500 | 1.33304700  | 0.18244500  |
| C | -4.34067000 | 0.59114100  | -0.91656900 |
| C | -4.28741200 | -0.83210500 | -0.89150300 |
| H | -4.00496400 | -1.18472600 | 2.51311900  |
| H | -3.92795200 | 1.23700100  | 2.35879000  |
| H | -4.44672900 | 1.05598900  | -1.89000200 |
| H | -4.63447200 | -1.39574400 | -1.74888400 |
| C | -3.17113400 | -2.69653300 | 0.26663500  |
| C | -2.76596700 | -3.20394000 | -1.06192800 |
| C | -2.56348700 | -3.37379300 | 1.41623300  |
| C | -1.47113000 | -3.77499000 | -1.14299900 |
| H | -3.45924000 | -3.33198500 | -1.88688500 |
| C | -1.32464700 | -3.87627300 | 1.29128700  |
| H | -3.11302200 | -3.45490100 | 2.34803600  |
| C | -0.63863400 | -3.80401100 | -0.00145800 |
| H | -1.10338500 | -4.11751500 | -2.10689600 |
| H | -0.81672700 | -4.34615300 | 2.12584700  |
| C | 0.82557600  | -3.66991000 | -0.14915400 |
| C | 1.73884600  | -3.96524300 | 0.80406800  |
| C | 1.19661300  | -2.78763700 | -1.32407300 |
| C | 3.06431100  | -3.37105500 | 0.83026800  |
| H | 1.44092600  | -4.56711200 | 1.65656700  |
| C | 2.52790700  | -2.07089100 | -1.20326300 |
| H | 1.02579300  | -3.25819700 | -2.29582500 |
| C | 3.41488400  | -2.41546800 | -0.05799100 |
| H | 3.69478700  | -3.56869600 | 1.69022600  |
| H | 3.05685000  | -1.95859200 | -2.14878000 |
| C | -3.17076100 | 2.56332400  | 0.04359000  |
| C | -2.80793500 | 3.08294100  | -1.23859600 |
| C | -2.79463500 | 3.43343500  | 1.18006700  |

|    |             |             |             |
|----|-------------|-------------|-------------|
| C  | -1.55489300 | 3.69695300  | -1.33687300 |
| H  | -3.35933700 | 2.85128600  | -2.14261800 |
| C  | -1.63038200 | 4.09729300  | 1.11069400  |
| H  | -3.49740300 | 3.57909500  | 1.99516100  |
| C  | -0.79842700 | 3.78767700  | -0.07605100 |
| H  | -1.17649900 | 4.07796200  | -2.27830300 |
| H  | -1.33947700 | 4.84719400  | 1.83875100  |
| C  | 3.28325900  | 2.56594000  | 0.11748700  |
| C  | 2.67038600  | 3.27677900  | 1.19194400  |
| C  | 2.62727300  | 2.60510500  | -1.10282300 |
| C  | 1.40288800  | 3.78188600  | 1.10525000  |
| H  | 3.20977500  | 3.37492500  | 2.12827000  |
| C  | 1.30271000  | 3.11319300  | -1.24527800 |
| H  | 3.07941300  | 2.13461200  | -1.96883300 |
| C  | 0.60678900  | 3.62042100  | -0.07306800 |
| H  | 0.96304800  | 4.27218500  | 1.96520500  |
| H  | 0.92224900  | 3.32207300  | -2.23925100 |
| C  | 4.25199700  | 1.47065500  | 0.34438900  |
| C  | 4.89230400  | 0.83829100  | -0.73386400 |
| C  | 4.08982400  | 0.72040600  | 1.51473600  |
| C  | 4.92858100  | -0.54458900 | -0.79439400 |
| H  | 5.17635500  | 1.41356400  | -1.60870700 |
| C  | 4.14877000  | -0.66512400 | 1.45903800  |
| H  | 3.66712000  | 1.17759200  | 2.40184700  |
| C  | 4.36085100  | -1.30999400 | 0.23608400  |
| H  | 5.22833100  | -1.02400200 | -1.72032900 |
| H  | 3.76678300  | -1.23308400 | 2.29950500  |
| Be | -0.51768300 | -2.09145500 | -0.92472300 |
| Be | 1.28594900  | -0.91642200 | -1.03637400 |
| Be | 0.69185200  | 1.36975600  | -0.90430200 |
| Be | -1.41401700 | 2.01403600  | -0.61279700 |
| Be | -0.69835200 | -0.03063400 | -0.74792200 |
| Be | -2.45547900 | -1.30866800 | -0.71665400 |

## 7. Be<sub>7</sub>@[6]CPP

|   |            |            |             |
|---|------------|------------|-------------|
| C | 0.75239400 | 3.84932300 | 0.16072600  |
| C | 1.47294100 | 3.75537000 | 1.34843800  |
| C | 2.74589100 | 3.16816400 | 1.37673300  |
| C | 3.35124400 | 2.66591200 | 0.23125400  |
| C | 2.77002700 | 3.05498600 | -1.01544700 |
| C | 1.49127100 | 3.64288100 | -1.04652300 |
| H | 0.98531700 | 3.94384200 | 2.29644600  |
| H | 3.16821500 | 2.94462000 | 2.34928600  |
| H | 3.33247900 | 2.96632700 | -1.93441000 |
| H | 1.10314600 | 3.99368200 | -1.99490100 |

|   |             |             |             |
|---|-------------|-------------|-------------|
| C | -0.70759500 | 3.76203500  | 0.10675100  |
| C | -1.28083700 | 3.28484700  | -1.10651000 |
| C | -1.50972000 | 3.67719800  | 1.24747400  |
| C | -2.48283700 | 2.58009100  | -1.11038500 |
| H | -0.83522900 | 3.51758200  | -2.06262700 |
| C | -2.73345400 | 3.01984100  | 1.25884500  |
| H | -1.13863900 | 4.06996200  | 2.18789400  |
| C | -3.20407000 | 2.34320800  | 0.11868000  |
| H | -2.93864300 | 2.32530300  | -2.06165100 |
| H | -3.27453100 | 2.92169600  | 2.19156200  |
| C | -4.16771900 | 1.29063900  | 0.15000700  |
| C | -4.71408900 | 0.66983600  | 1.38541600  |
| C | -4.65602100 | 0.68918600  | -1.09970700 |
| C | -4.71406400 | -0.66988800 | 1.38540900  |
| H | -5.14445300 | 1.26601300  | 2.18465100  |
| C | -4.65599800 | -0.68921700 | -1.09971000 |
| H | -4.92374100 | 1.27059500  | -1.97683600 |
| C | -4.16767300 | -1.29066300 | 0.14999500  |
| H | -5.14440100 | -1.26609000 | 2.18464000  |
| H | -4.92369400 | -1.27062800 | -1.97684600 |
| C | 4.14704200  | 1.42506100  | 0.23715500  |
| C | 4.24567700  | 0.71180200  | -1.01746400 |
| C | 4.37883400  | 0.70993500  | 1.39049000  |
| C | 4.24567600  | -0.71175900 | -1.01746800 |
| H | 4.51919700  | 1.24381400  | -1.92007100 |
| C | 4.37884200  | -0.70988800 | 1.39048800  |
| H | 4.33400500  | 1.20144200  | 2.35478700  |
| C | 4.14705300  | -1.42501600 | 0.23715600  |
| H | 4.51921600  | -1.24377100 | -1.92006900 |
| H | 4.33402000  | -1.20139700 | 2.35478500  |
| C | 0.75244100  | -3.84932000 | 0.16073900  |
| C | 1.47298500  | -3.75535200 | 1.34844800  |
| C | 1.49130600  | -3.64286800 | -1.04651500 |
| C | 2.74592800  | -3.16812600 | 1.37673900  |
| H | 0.98536800  | -3.94382600 | 2.29645800  |
| C | 2.77005900  | -3.05496700 | -1.01544500 |
| H | 1.10318400  | -3.99369700 | -1.99488600 |
| C | 3.35126900  | -2.66587300 | 0.23125800  |
| H | 3.16824600  | -2.94456400 | 2.34929000  |
| H | 3.33253200  | -2.96634200 | -1.93439900 |
| C | -0.70754900 | -3.76205500 | 0.10675900  |
| C | -1.28078100 | -3.28487600 | -1.10650500 |
| C | -1.50968500 | -3.67722700 | 1.24747500  |
| C | -2.48278000 | -2.58012200 | -1.11039000 |
| H | -0.83514100 | -3.51758400 | -2.06261500 |
| C | -2.73342400 | -3.01987800 | 1.25883100  |

|    |             |             |             |
|----|-------------|-------------|-------------|
| H  | -1.13861200 | -4.06998800 | 2.18789900  |
| C  | -3.20402700 | -2.34324200 | 0.11866400  |
| H  | -2.93855500 | -2.32529900 | -2.06166000 |
| H  | -3.27451100 | -2.92173700 | 2.19154300  |
| Be | -2.98010500 | 0.00001300  | -0.57036900 |
| Be | -0.99429800 | -1.09454800 | -1.18557600 |
| Be | 1.27281000  | -1.72107800 | -1.28230200 |
| Be | 0.59548900  | 0.00000900  | -1.74982800 |
| Be | 2.53618800  | 0.00003300  | -1.39900000 |
| Be | -0.99433800 | 1.09451900  | -1.18559000 |
| Be | 1.27272800  | 1.72109500  | -1.28219300 |

### 8. Be<sub>8</sub>@[6]CPP

|   |             |             |             |
|---|-------------|-------------|-------------|
| C | 2.81798900  | -2.86549600 | 0.22005500  |
| C | 3.43697700  | -2.50832000 | -1.04517500 |
| C | 4.37751900  | -1.43984600 | -1.06268600 |
| C | 4.69364500  | -0.74198500 | 0.08217400  |
| C | 4.43720800  | -1.43489000 | 1.31972600  |
| C | 3.55419900  | -2.46197200 | 1.39855000  |
| H | 3.27557300  | -3.10805900 | -1.93211000 |
| H | 4.65903700  | -1.05901800 | -2.03803600 |
| H | 4.90066700  | -1.08197700 | 2.23388900  |
| H | 3.33844300  | -2.92505600 | 2.35368700  |
| C | 1.44393000  | -3.22916700 | 0.22688800  |
| C | 0.67333000  | -3.44302100 | 1.43976300  |
| C | 0.74571700  | -3.33889600 | -1.08688900 |
| C | -0.67313400 | -3.44257300 | 1.43982200  |
| H | 1.20603800  | -3.57846300 | 2.37319400  |
| C | -0.74557400 | -3.33851900 | -1.08671700 |
| H | 1.19196400  | -3.99600400 | -1.83201900 |
| C | -1.44362400 | -3.22841400 | 0.22690700  |
| H | -1.20589300 | -3.57762100 | 2.37327400  |
| H | -1.19241700 | -3.99509500 | -1.83194800 |
| C | -2.81766900 | -2.86456800 | 0.21998400  |
| C | -3.43663900 | -2.50750200 | -1.04523900 |
| C | -3.55400700 | -2.46132300 | 1.39847500  |
| C | -4.37786500 | -1.43969400 | -1.06278700 |
| H | -3.27475800 | -3.10700900 | -1.93224000 |
| C | -4.43758200 | -1.43474300 | 1.31966000  |
| H | -3.33799500 | -2.92429200 | 2.35360700  |
| C | -4.69429600 | -0.74197200 | 0.08208500  |
| H | -4.65956500 | -1.05898900 | -2.03813100 |
| H | -4.90122600 | -1.08203500 | 2.23380500  |
| C | 4.69364000  | 0.74198000  | 0.08217400  |
| C | 4.43719900  | 1.43488200  | 1.31972500  |

|    |             |             |             |
|----|-------------|-------------|-------------|
| C  | 4.37751100  | 1.43983900  | -1.06268600 |
| C  | 3.55418900  | 2.46196500  | 1.39854900  |
| H  | 4.90065000  | 1.08196500  | 2.23389000  |
| C  | 3.43696500  | 2.50830800  | -1.04517400 |
| H  | 4.65902500  | 1.05900800  | -2.03803600 |
| C  | 2.81798400  | 2.86549400  | 0.22005300  |
| H  | 3.33842600  | 2.92504200  | 2.35368700  |
| H  | 3.27554700  | 3.10803400  | -1.93211500 |
| C  | -1.44362500 | 3.22842500  | 0.22690600  |
| C  | -0.74557400 | 3.33852800  | -1.08671800 |
| C  | -0.67313700 | 3.44260300  | 1.43981800  |
| C  | 0.74571200  | 3.33890600  | -1.08689000 |
| H  | -1.19242100 | 3.99509500  | -1.83195600 |
| C  | 0.67332700  | 3.44305200  | 1.43976000  |
| H  | -1.20589600 | 3.57767000  | 2.37326800  |
| C  | 1.44392600  | 3.22917800  | 0.22688700  |
| H  | 1.19196300  | 3.99600500  | -1.83202600 |
| H  | 1.20603500  | 3.57851300  | 2.37318800  |
| C  | -2.81766900 | 2.86456500  | 0.21998200  |
| C  | -3.55400000 | 2.46131100  | 1.39847400  |
| C  | -3.43663200 | 2.50748700  | -1.04523800 |
| C  | -4.43757400 | 1.43473000  | 1.31966000  |
| H  | -3.33798100 | 2.92427300  | 2.35360800  |
| C  | -4.37786100 | 1.43968200  | -1.06278700 |
| H  | -3.27473700 | 3.10698000  | -1.93224500 |
| C  | -4.69429200 | 0.74196100  | 0.08208500  |
| H  | -4.90121000 | 1.08201700  | 2.23380700  |
| H  | -4.65955600 | 1.05897500  | -2.03813100 |
| Be | -1.75999600 | -1.68375000 | -0.75769300 |
| Be | 1.76059100  | -1.68506700 | -0.75810600 |
| Be | -1.75997200 | 1.68374800  | -0.75766400 |
| Be | 1.76056500  | 1.68506600  | -0.75807700 |
| Be | 0.00027900  | -1.84161300 | -1.80535100 |
| Be | -0.97849000 | 0.00000700  | -1.73703000 |
| Be | 0.00027900  | 1.84162100  | -1.80536200 |
| Be | 0.97649400  | 0.00000600  | -1.73296100 |

## 9. Be<sub>9</sub>@[6]CPP

|   |             |             |             |
|---|-------------|-------------|-------------|
| C | -3.56776300 | -1.84039900 | 0.17231100  |
| C | -3.72434500 | -1.09809400 | 1.37772800  |
| C | -3.86157800 | 0.26720500  | 1.37616800  |
| C | -3.86363600 | 1.02514100  | 0.17072300  |
| C | -4.07730000 | 0.27311600  | -1.00814400 |
| C | -3.93185900 | -1.14766300 | -1.00878800 |
| H | -3.59015300 | -1.60849400 | 2.32391700  |

|   |             |             |             |
|---|-------------|-------------|-------------|
| H | -3.83312000 | 0.79497400  | 2.32204300  |
| H | -4.28385300 | 0.77507600  | -1.94689300 |
| H | -4.03576400 | -1.68229400 | -1.94647700 |
| C | -2.79585400 | -3.07162200 | 0.17635800  |
| C | -2.45458800 | -3.82051400 | -1.03214100 |
| C | -2.39404900 | -3.75887500 | 1.43261200  |
| C | -1.17003600 | -4.37548200 | -1.03110000 |
| H | -3.08061500 | -3.86058600 | -1.91710400 |
| C | -1.16519100 | -4.28720100 | 1.43180700  |
| H | -3.10335900 | -3.91490300 | 2.24068700  |
| C | -0.39010500 | -4.11156400 | 0.17492900  |
| H | -0.76849900 | -4.85541500 | -1.91729900 |
| H | -0.78963700 | -4.90804200 | 2.24059500  |
| C | 1.04357600  | -3.85741400 | 0.17119300  |
| C | 1.69911600  | -3.47590100 | 1.37637900  |
| C | 1.80177000  | -3.66730800 | -1.00777200 |
| C | 2.81310700  | -2.67474000 | 1.37733800  |
| H | 1.22746400  | -3.71409900 | 2.32234000  |
| C | 2.95979300  | -2.83135100 | -1.00908100 |
| H | 1.47024500  | -4.09744600 | -1.94636600 |
| C | 3.37800300  | -2.16903600 | 0.17158400  |
| H | 3.18794000  | -2.30264800 | 2.32328800  |
| H | 3.47447900  | -2.65428600 | -1.94696900 |
| C | -3.36677800 | 2.39362600  | 0.17441700  |
| C | -3.20455800 | 3.20107700  | -1.03150800 |
| C | -3.13148100 | 3.15254300  | 1.43157000  |
| C | -2.08143100 | 4.03583200  | -1.03192600 |
| H | -3.82062600 | 3.09345300  | -1.91797100 |
| C | -2.05920700 | 3.95210300  | 1.43273600  |
| H | -3.85747000 | 3.13805200  | 2.23985400  |
| C | -1.26268100 | 3.95623300  | 0.17682600  |
| H | -1.80268800 | 4.59838700  | -1.91651400 |
| H | -1.83989600 | 4.64462700  | 2.24068200  |
| C | 2.81955800  | 2.83247300  | 0.17123400  |
| C | 2.16153800  | 3.20808800  | 1.37685100  |
| C | 2.27527200  | 3.39476500  | -1.00718100 |
| C | 0.91055900  | 3.77198900  | 1.37862400  |
| H | 2.60376300  | 2.91768200  | 2.32242000  |
| C | 0.97197500  | 3.97895700  | -1.00757500 |
| H | 2.81342700  | 3.32383000  | -1.94593900 |
| C | 0.18971400  | 4.00870600  | 0.17330100  |
| H | 0.40135300  | 3.91042300  | 2.32485600  |
| H | 0.56087000  | 4.33694000  | -1.94496900 |
| C | 3.75678000  | 1.71831400  | 0.17418000  |
| C | 4.37501500  | 1.17493300  | -1.03220500 |
| C | 4.29682800  | 1.13470400  | 1.43084000  |

|    |             |             |             |
|----|-------------|-------------|-------------|
| C  | 4.53646400  | -0.21510800 | -1.03337200 |
| H  | 4.58985400  | 1.76271100  | -1.91837400 |
| C  | 4.45370600  | -0.19369500 | 1.43130200  |
| H  | 4.64690300  | 1.77036900  | 2.23954200  |
| C  | 4.05894400  | -0.88521200 | 0.17511800  |
| H  | 4.88393400  | -0.73718200 | -1.91847500 |
| H  | 4.94396800  | -0.73012300 | 2.23899000  |
| Be | 1.32327300  | -1.77020500 | -1.15255000 |
| Be | 2.79718300  | 0.28640500  | -0.62095300 |
| Be | 0.87179100  | 2.03096300  | -1.15260800 |
| Be | -0.47383100 | -1.08196200 | -1.92408800 |
| Be | -1.64563600 | 2.27906500  | -0.62038100 |
| Be | -1.15109200 | -2.56437500 | -0.61985800 |
| Be | -2.19456400 | -0.26044500 | -1.15292400 |
| Be | 1.17427200  | 0.13066400  | -1.92427300 |
| Be | -0.69994200 | 0.95169500  | -1.92433600 |

#### 10. Be<sub>10</sub>@I6|CPP

|   |             |             |             |
|---|-------------|-------------|-------------|
| C | 2.82511400  | -3.05290000 | 0.21551900  |
| C | 3.54805900  | -2.74940700 | -1.04583600 |
| C | 4.25698800  | -1.53383600 | -1.06105900 |
| C | 4.41239700  | -0.74996300 | 0.11120400  |
| C | 4.26889400  | -1.49430500 | 1.35871100  |
| C | 3.55335600  | -2.64090600 | 1.41405300  |
| H | 3.58579500  | -3.44082600 | -1.87794100 |
| H | 4.62328200  | -1.16695000 | -2.01612200 |
| H | 4.73795400  | -1.10892500 | 2.25656600  |
| H | 3.48078100  | -3.20725500 | 2.33538200  |
| C | 1.47213800  | -3.42167400 | 0.17519600  |
| C | 0.67477700  | -3.52932800 | 1.37978700  |
| C | 0.76032000  | -3.37978800 | -1.12941300 |
| C | -0.67541200 | -3.52959400 | 1.37973400  |
| H | 1.19579800  | -3.58051500 | 2.32871300  |
| C | -0.76067700 | -3.37958400 | -1.12943500 |
| H | 1.18056900  | -3.99279600 | -1.92115800 |
| C | -1.47268100 | -3.42195600 | 0.17509400  |
| H | -1.19651200 | -3.58099800 | 2.32861100  |
| H | -1.18103500 | -3.99201000 | -1.92157300 |
| C | -2.82562600 | -3.05267700 | 0.21529100  |
| C | -3.54799700 | -2.74866900 | -1.04617300 |
| C | -3.55419000 | -2.64068800 | 1.41365000  |
| C | -4.25692800 | -1.53310100 | -1.06142500 |
| H | -3.58503300 | -3.43957400 | -1.87872500 |
| C | -4.26974800 | -1.49407400 | 1.35831300  |
| H | -3.48183200 | -3.20710000 | 2.33495600  |

|    |             |             |             |
|----|-------------|-------------|-------------|
| C  | -4.41302900 | -0.74951300 | 0.11094800  |
| H  | -4.62283200 | -1.16613900 | -2.01660600 |
| H  | -4.73895600 | -1.10885200 | 2.25616100  |
| C  | 4.41235000  | 0.74941100  | 0.11117000  |
| C  | 4.26917000  | 1.49392000  | 1.35859900  |
| C  | 4.25729700  | 1.53333300  | -1.06118800 |
| C  | 3.55387600  | 2.64068100  | 1.41387500  |
| H  | 4.73822000  | 1.10853600  | 2.25645900  |
| C  | 3.54841800  | 2.74877400  | -1.04593800 |
| H  | 4.62393700  | 1.16663000  | -2.01618300 |
| C  | 2.82559100  | 3.05258200  | 0.21534100  |
| H  | 3.48143700  | 3.20714500  | 2.33513900  |
| H  | 3.58548200  | 3.43979300  | -1.87840200 |
| C  | -1.47217000 | 3.42229600  | 0.17492700  |
| C  | -0.76017500 | 3.37959900  | -1.12959900 |
| C  | -0.67485600 | 3.53027300  | 1.37949100  |
| C  | 0.76077600  | 3.37947800  | -1.12954100 |
| H  | -1.18048600 | 3.99184300  | -1.92190700 |
| C  | 0.67535200  | 3.52993200  | 1.37953100  |
| H  | -1.19591900 | 3.58213200  | 2.32836100  |
| C  | 1.47266600  | 3.42173100  | 0.17498800  |
| H  | 1.18124400  | 3.99189000  | -1.92163700 |
| H  | 1.19639000  | 3.58150400  | 2.32842700  |
| C  | -2.82512100 | 3.05289800  | 0.21529400  |
| C  | -3.55345600 | 2.64089900  | 1.41378300  |
| C  | -3.54776400 | 2.74899100  | -1.04600200 |
| C  | -4.26902700 | 1.49430000  | 1.35848700  |
| H  | -3.48081000 | 3.20718700  | 2.33513800  |
| C  | -4.25720200 | 1.53382000  | -1.06126200 |
| H  | -3.58442600 | 3.43982600  | -1.87863200 |
| C  | -4.41274400 | 0.74995200  | 0.11102400  |
| H  | -4.73796400 | 1.10894800  | 2.25642200  |
| H  | -4.62376500 | 1.16723200  | -2.01633100 |
| Be | -1.88643900 | -1.87797600 | -0.92715800 |
| Be | 1.88697800  | -1.87829800 | -0.92903800 |
| Be | -1.88584100 | 1.87805300  | -0.92667300 |
| Be | 1.88677000  | 1.87753000  | -0.92802600 |
| Be | 0.00007000  | -1.71557100 | -1.60777800 |
| Be | -0.98708900 | 0.00002400  | -1.09158200 |
| Be | 0.00034400  | 1.71542800  | -1.60810200 |
| Be | 0.98755500  | -0.00023800 | -1.09464200 |
| Be | -2.72767500 | -0.00000400 | -0.24577900 |
| Be | 2.72688700  | -0.00049400 | -0.24571500 |



## REFERENCES

- 1 H. Q. Ta, R. G. Mendes, Y. Liu, X. Yang, J. Luo, A. Bachmatiuk, T. Gemming, M. Zeng, L. Fu, L. Liu and M. H. Rummeli, In Situ Fabrication of Freestanding Single-Atom-Thick 2D Metal/Metallene and 2D Metal/ Metallene Oxide Membranes: Recent Developments, *Advanced Science*, 2021, **8**, 2100619.
- 2 X. Zhao, J. Dan, J. Chen, Z. Ding, W. Zhou, K. Loh and S. Pennycook, Atom-by-Atom Fabrication of Monolayer Molybdenum Membranes, *Advanced Materials*, 2018, **30**, 1707281.
- 3 B. Abyaz, Z. Mahdavifar, G. Schreckenbach and Y. Gao, Prediction of beryllium clusters (Be<sub>n</sub>; n = 3–25) from first principles, *Phys. Chem. Chem. Phys.*, 2021, **23**, 19716–19728.
